# Supplementary material for: Almond Consumption and Processing Affects the Composition of the Gastrointestinal Microbiota of Healthy Adult Men and Women: A Randomized Controlled Trial
Source: PubMed Central journal article supplement (PMC5852702; doi:10.3390/nu10020126), 2018-01-26
Supplement: nutrients-10-00126-s001.pdf [file nutrients-10-00126-s001.pdf]

# Supplemental Figure 1: Phylogenetic Diversity

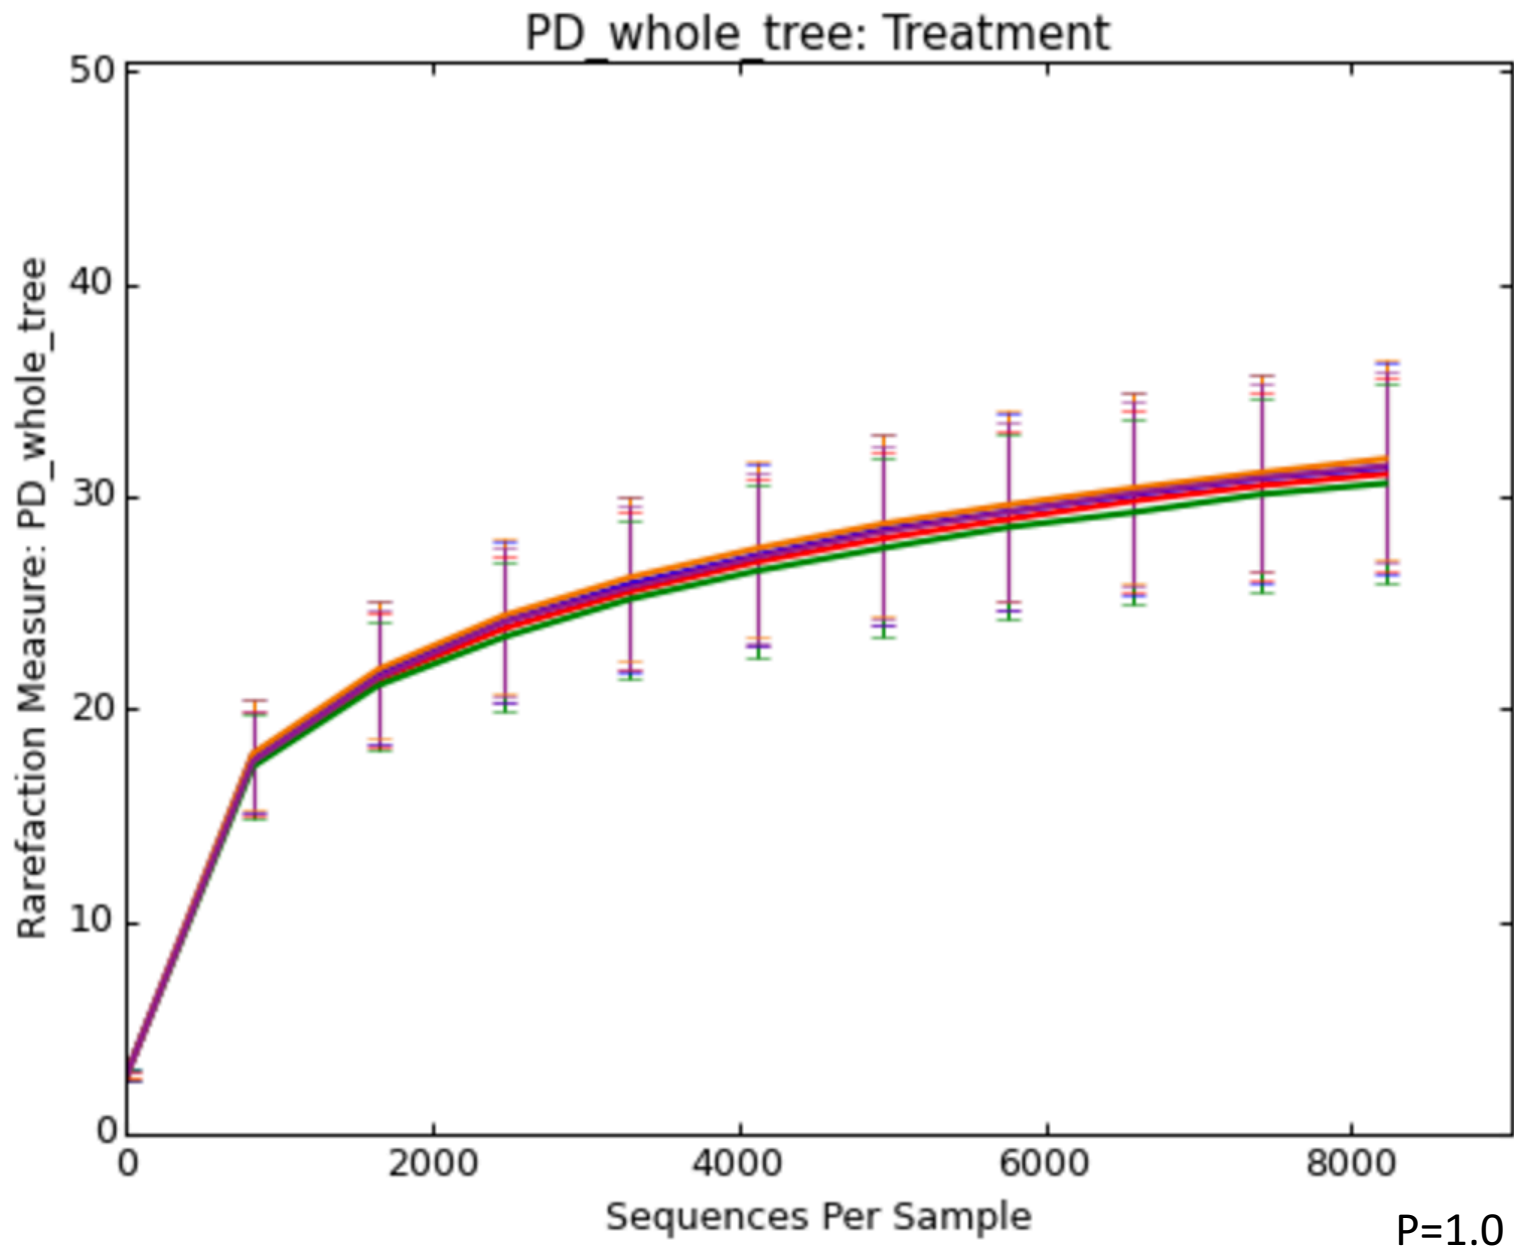

# Supplemental Figure 2: Observed OTUs

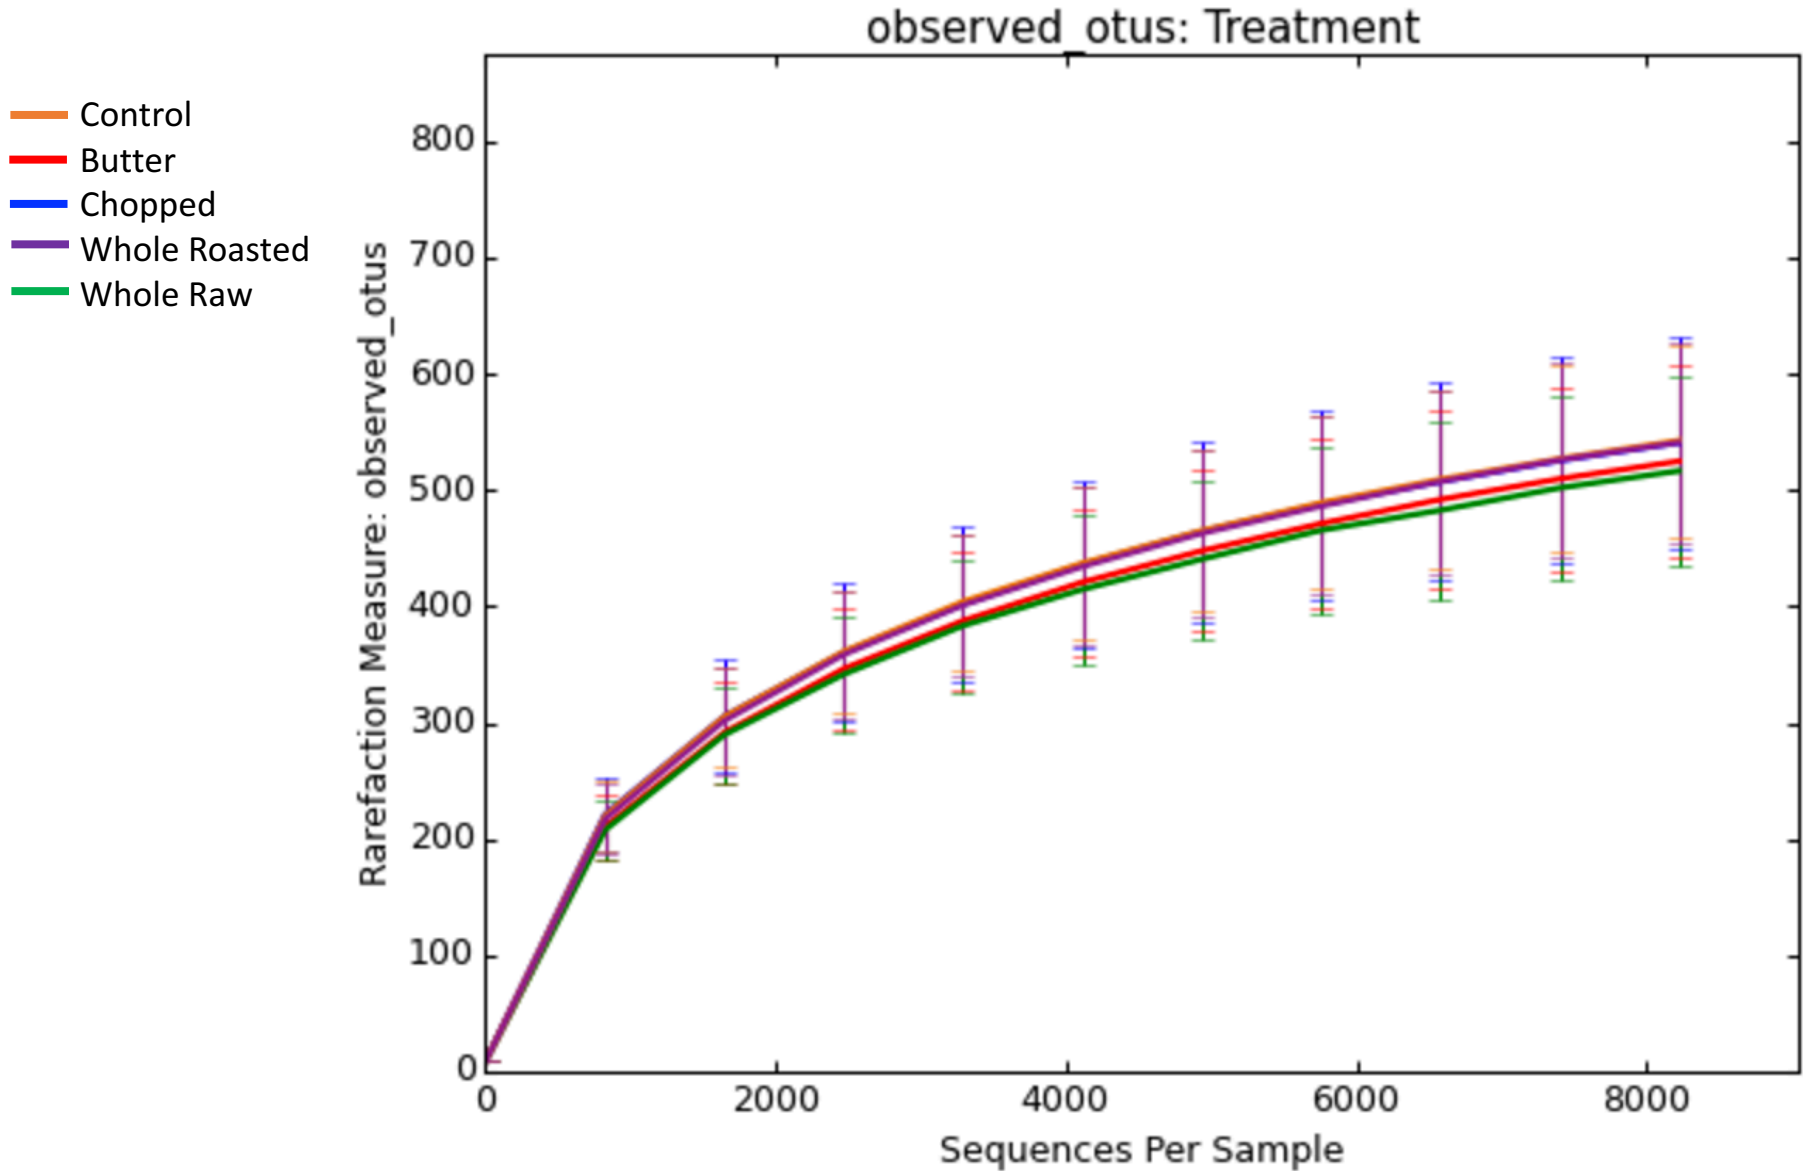

# Supplemental Figure 3. Unweighted Unifrac PCoA

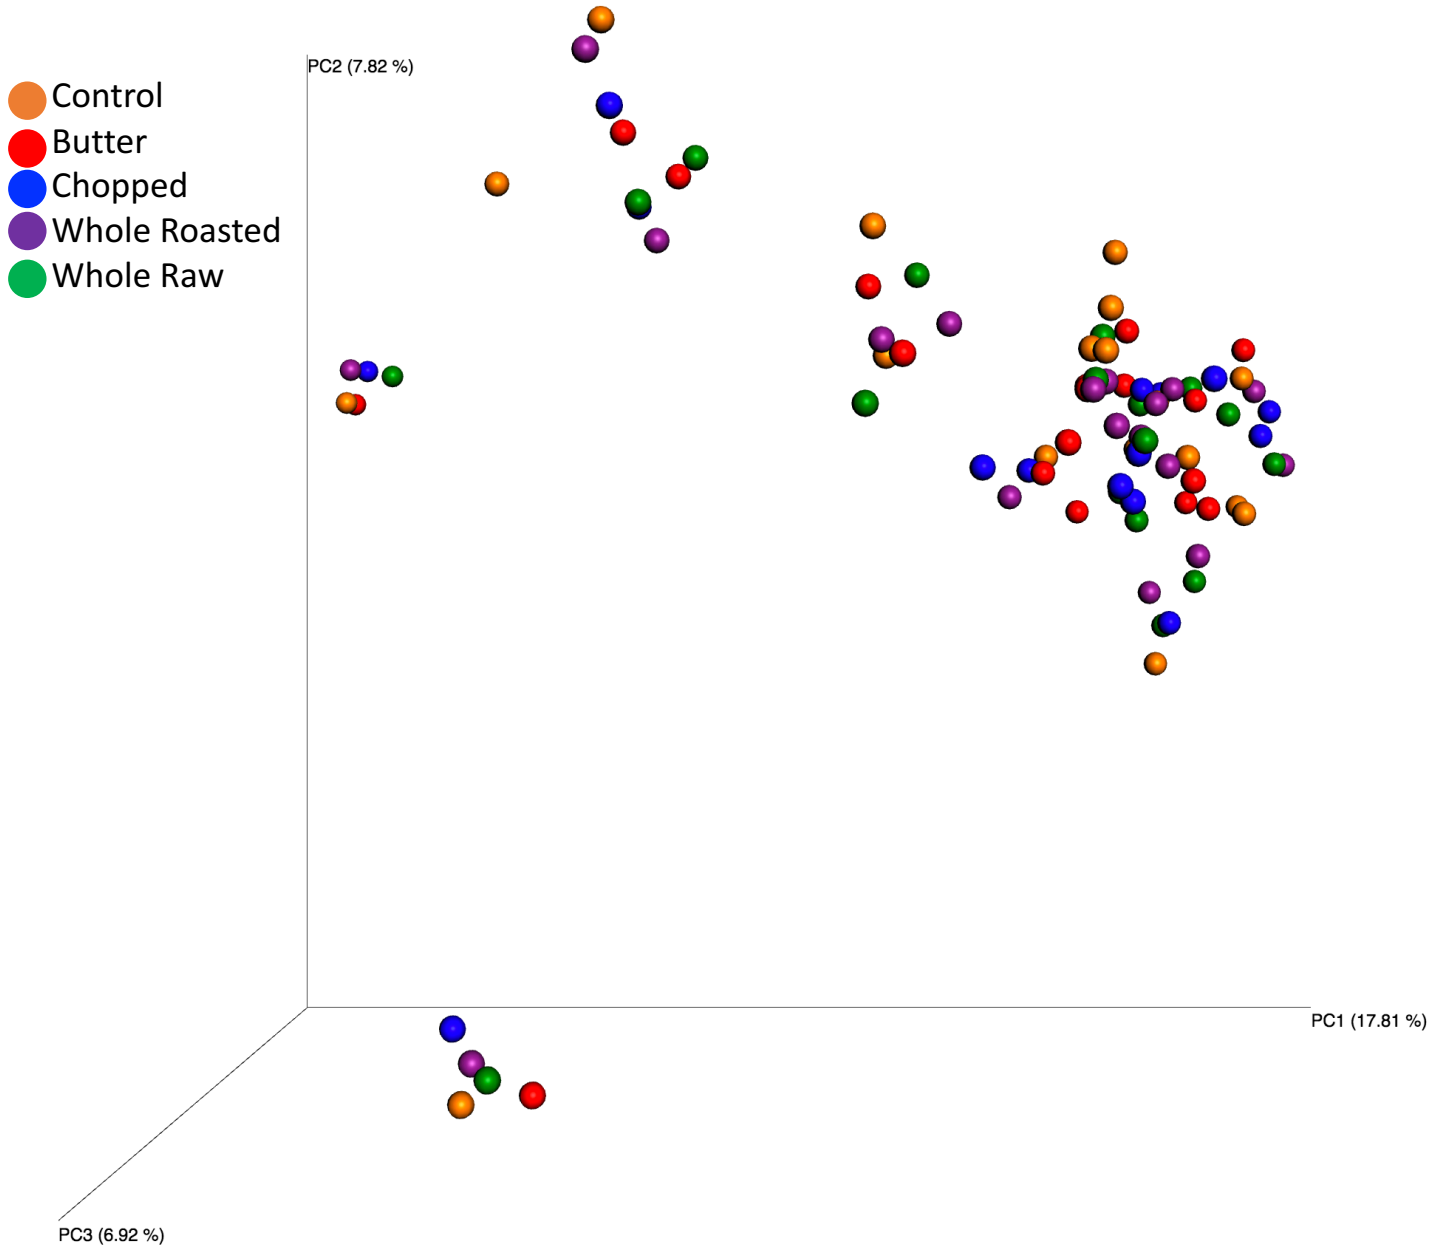

All within Treatment vs. All between Treatment  $t=3.5$   $p=0.001$  Bonferroni-correct  $p\text{-value}=0.136$

# Supplemental Figure 4. Weighted Unifrac PCoA

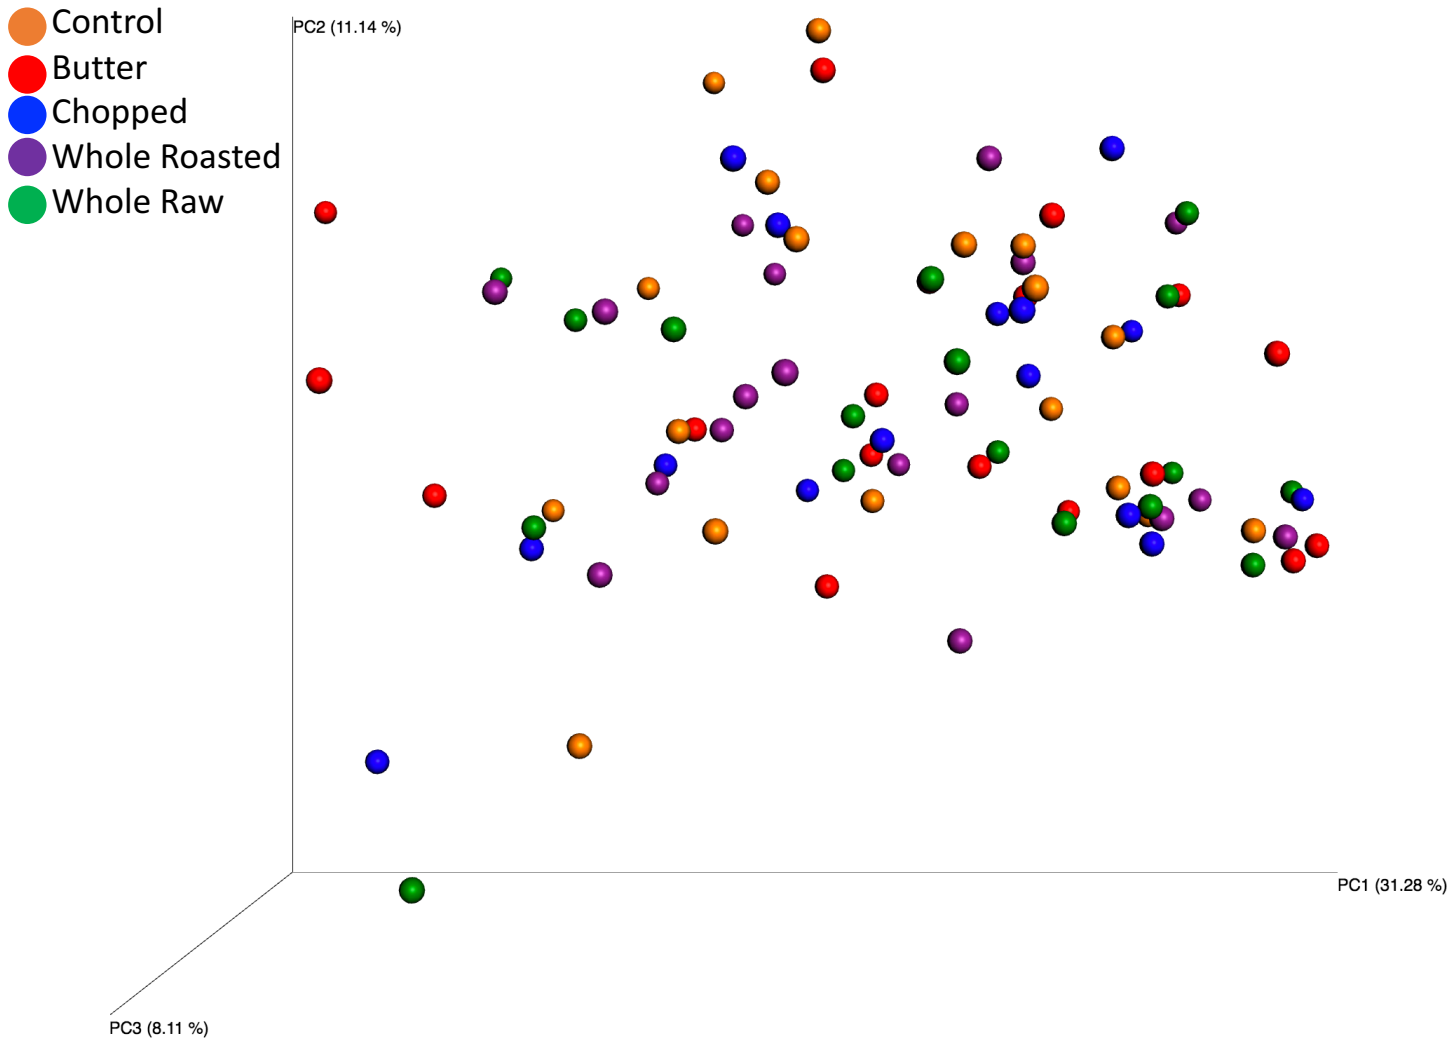

All within Treatment vs. All between Treatment  $t=2.1$   $p=0.03$  Bonferroni-correct  $p\text{-value}=1.0$
